# Supplementary material
Source: Springer Nature journal article supplement (https://www.springermedizin.de/resource/supplementary/12879_2009_1210_MOESM3_ESM.pdf/9442096)

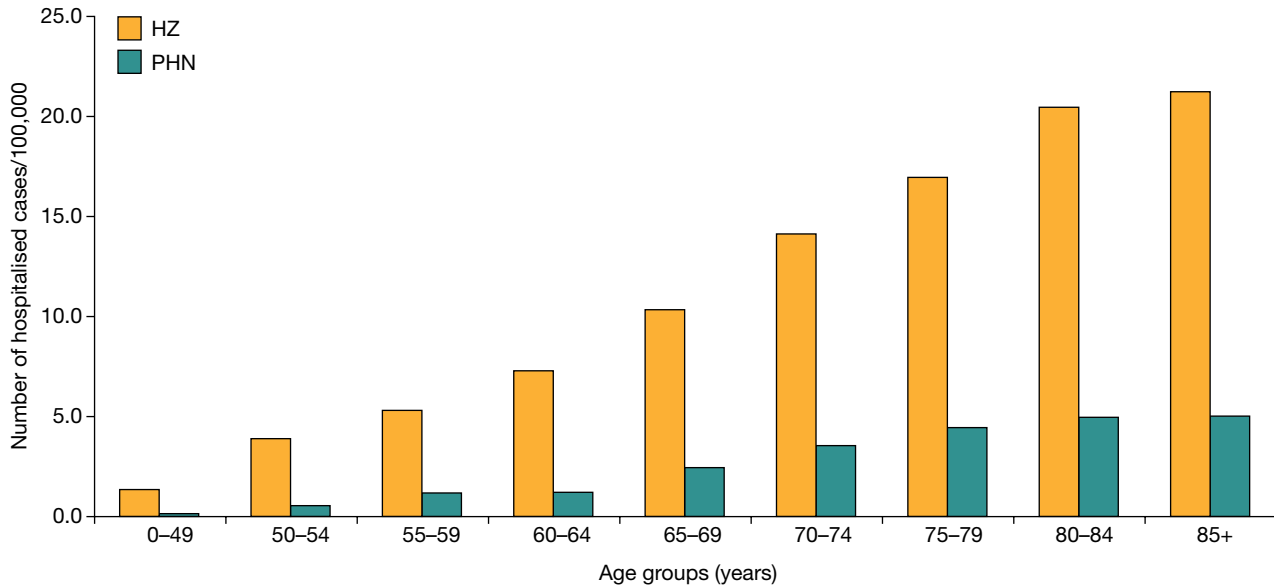

|  |      |      |      |      |       |       |       |       |       |
|--|------|------|------|------|-------|-------|-------|-------|-------|
|  | 1.31 | 3.83 | 5.28 | 7.19 | 10.31 | 14.07 | 16.99 | 20.48 | 21.55 |
|  | 0.12 | 0.58 | 1.15 | 1.20 | 2.45  | 3.57  | 4.45  | 4.97  | 4.99  |

HZ = herpes zoster; PHN = post-herpetic neuralgia

Supplement: MOESM3 [file 9442096]
